# Supplementary material for: Up-Cycling Grape Pomace through Sourdough Fermentation: Characterization of Phenolic Compounds, Antioxidant Activity, and Anti-Inflammatory Potential
Source: MDPI journal article supplement (doi:10.3390/antiox12081521), 2023-07-29
Supplement: s1 [file s1]

## Supplementary Material

**Table S1.** Bread recipes. cY-B, control bread; SD0-B, control sourdough bread, containing sourdough without grape pomace (SD0); SD5-B, bread containing sourdough added of 5% grape pomace (SD5).

| % (w/w)       | cY-B | SD0-B | SD5-B |
|---------------|------|-------|-------|
| Water         | 37.5 | 28.13 | 28.13 |
| Wheat flour   | 62.5 | 46.87 | 46.87 |
| SD5           | 0    | 0     | 25    |
| SD0           | 0    | 25    | 0     |
| Baker's yeast | 2    | 2     | 2     |

**Table S2.** Nutritional characteristics of the breads: cY-B, control bread, leavened with 2% w/w baker's yeast; SD0-B, control sourdough bread, containing 25% w/w of the SD0 sourdough, and leavened with 2% w/w baker's yeast; SD5-B, a sourdough bread containing 25% w/w of the SD5 sourdough, and leavened with 2% w/w baker's yeast.

|                               | cY-B                      | SD0-B                     | SD5-B                     |
|-------------------------------|---------------------------|---------------------------|---------------------------|
| <b>Moisture (%)</b>           | 27.2 ± 1.3 <sup>a</sup>   | 27.4 ± 2.0 <sup>a</sup>   | 27.1 ± 1.1 <sup>a</sup>   |
| <b>Proteins (%)</b>           | 8.68 ± 0.38 <sup>a</sup>  | 8.68 ± 0.48 <sup>a</sup>  | 8.71 ± 0.45 <sup>a</sup>  |
| <b>Lipids (%)</b>             | 0.87 ± 0.10 <sup>a</sup>  | 0.87 ± 0.08 <sup>a</sup>  | 0.95 ± 0.09 <sup>a</sup>  |
| <b>Carbohydrates (%)</b>      | 61.63 ± 0.36 <sup>a</sup> | 61.63 ± 0.42 <sup>a</sup> | 60.05 ± 0.19 <sup>b</sup> |
| <b>Dietary fibers (%)</b>     | 2.17 ± 0.14 <sup>b</sup>  | 2.37 ± 0.11 <sup>b</sup>  | 2.82 ± 0.09 <sup>a</sup>  |
| <b>Ash (%)</b>                | 0.52 ± 0.2 <sup>a</sup>   | 0.52 ± 0.1 <sup>a</sup>   | 0.60 ± 0.02 <sup>a</sup>  |
| <b>Energy Value (kJ/100g)</b> | 1209 ± 13 <sup>a</sup>    | 1209 ± 6 <sup>a</sup>     | 1203 ± 7 <sup>a</sup>     |

The data are the means of three independent analysis ± standard deviations (n = 3).

<sup>a-b</sup>Values in the same row with different superscript letters differ significantly (P < 0.05).
